# Supplementary material
Source: MDPI journal article supplement (https://www.mdpi.com/2072-4292/11/24/2902)
Supplement: s1 [file s1]

## Supplementary Figure

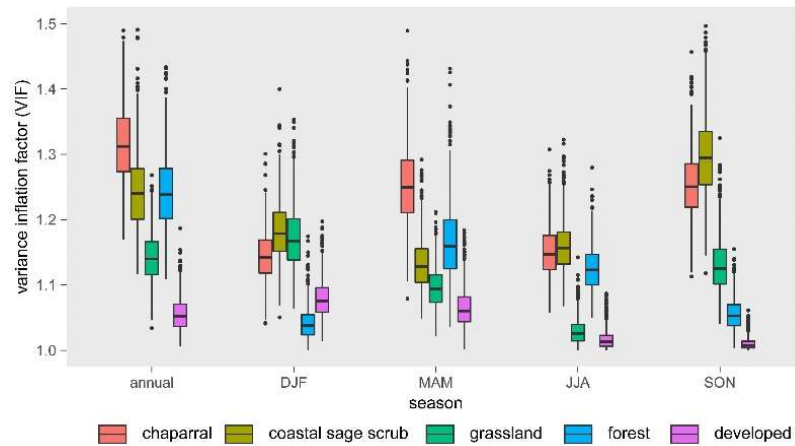

**Figure S1.** Variance inflation factors (VIFs) of the multiple linear regressions shown in Figure 12. VIF is a widely used indicator for measuring the multicollinearity in multiple linear regressions. Normally,  $VIF > 10$  indicates severe multicollinearity,  $5 < VIF < 10$  indicates weak multicollinearity, and  $VIF < 5$  indicates no multicollinearity. Nearly all the VIFs in this study  $< 1.5$ , indicating these multiple linear regressions are not affected by multicollinearity.
